# Supplementary material
Source: publisher figshare collection journal article supplement (https://sage.figshare.com/ndownloader/files/15255074)
Supplement: Supplementary file 1 [file 15255074]

**Supporting Information**

Fig. S1 TEM image of nanometer γ-Fe2O3 prepared by precipitation method. The bar length is 100 *nm*.


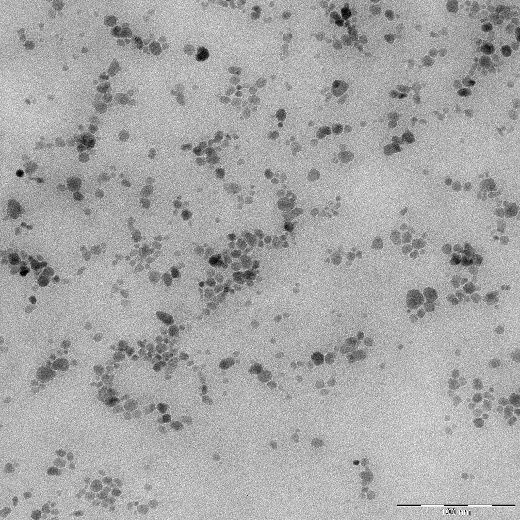


Fig. S2 The schematic of the concave meniscus-shaped capillary bridge between two equally sized particles with separation distance of . The liquid bridge is defined by the blue curve. is the interfacial tension between bulk and secondary phases and is the particle radius. The three-phase contact angle is calculated using the expanded Young–Dupré equation.


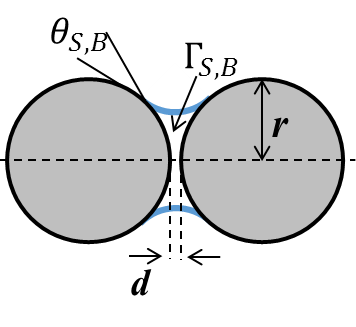

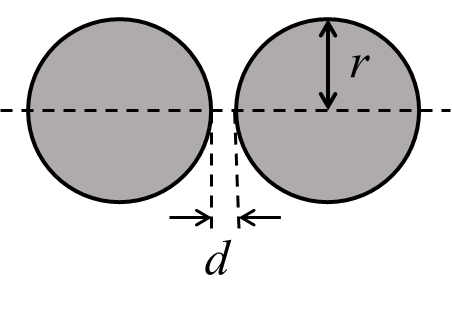


Fig. S3 Snapshots for MR suspensions with various volume fractions of CI particles with .


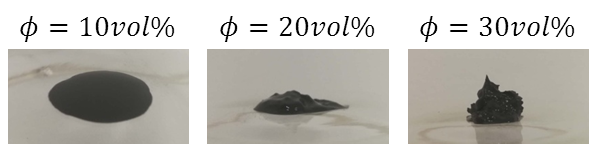


Fig. S4 Sedimentation ratio versus time for 20 vol% MRF. The sedimentation ratio is expressed as the height percentage of the particle-rich phase relative to the total fluid height.
